# Supplementary material for: Acemannan coated, cobalt-doped biphasic calcium phosphate nanoparticles for immunomodulation regulated bone regeneration
Source: Royal Society of Chemistry journal article supplement (doi:10.1039/d4bm00482e), 2024-01-01
Supplement: d4bm00482e1.pdf [file d4bm00482e1.pdf]

## Electronic supplementary information to

### ARTICLE

## Acemannan coated, cobalt-doped biphasic calcium phosphate nanoparticles for immunomodulation regulated bone regeneration

Received 00th January 20xx,  
Accepted 00th January 20xx

Deepa Negi,<sup>a</sup> Kumari Bhavya,<sup>a</sup> Durba Pal,<sup>a</sup> and Yashveer Singh<sup>a,b\*</sup>

DOI: 10.1039/x0xx00000x

---

<sup>a</sup>Department of Biomedical Engineering, Indian Institute of Technology Ropar, Rupnagar-140 001, Punjab, India.

<sup>b</sup>Department of Chemistry, Indian Institute of Technology Ropar, Rupnagar-140 001, Punjab, India.

Email: [yash@iitrpr.ac.in](mailto:yash@iitrpr.ac.in)

## Electronic supplementary information to

### ARTICLE

| <b>Table of contents</b>                                                       | <b>Page #</b> |
|--------------------------------------------------------------------------------|---------------|
| Quantification of biphasic calcium phosphate nanoparticles                     | 3             |
| FTIR spectra of BCP, 0.02% CoBCP, 0.5% CoBCP, and 2% CoBCP.                    | 3             |
| XRD spectra of BCP, 0.02% CoBCP, 0.5% CoBCP, and 2% CoBCP.                     | 4             |
| Viability of RAW264.7 cells in presence of nanoparticles using MTT assay.      | 5             |
| Cell viability of MC3T3-E1 cells in presence of nanoparticles using MTT assay. | 6             |
| List of antibodies and their details.                                          | 7             |
| List of primers and their sequences.                                           | 7             |

#### **Abbreviations**

**Ace:** acemannan.

**BCP:** biphasic calcium phosphate nanoparticles.

**CoBCP:** cobalt-doped biphasic calcium phosphate nanoparticles.

**RAW264.7:** murine leukemic monocyte macrophage cell line.

## Quantification of biphasic calcium phosphate nanoparticles (BCP)

### Content of HAP and $\beta$ -tricalcium phosphate in biphasic calcium phosphate nanoparticles

The percentage of hydroxyapatite (HAP) and  $\beta$ -tricalcium phosphate ( $\beta$ -TCP) was estimated by X-ray diffraction (XRD) technique. The XRD of biphasic calcium phosphate nanoparticles was scanned from  $2^\circ$  to  $90^\circ$ . The ratio was determined by using the ratio of intensities of the most intense diffraction peak of hydroxyapatite phase and that of  $\beta$ -TCP. XRD pattern of BCP indexes most intense peaks corresponds to HAP at  $32.2^\circ$  (816) and  $\beta$ -TCP at  $25.8^\circ$  (315). The ratio was calculated and the percentage of HAP in biphasic calcium phosphate and  $\beta$ -TCP were found to be 70.6% and 29.40%.

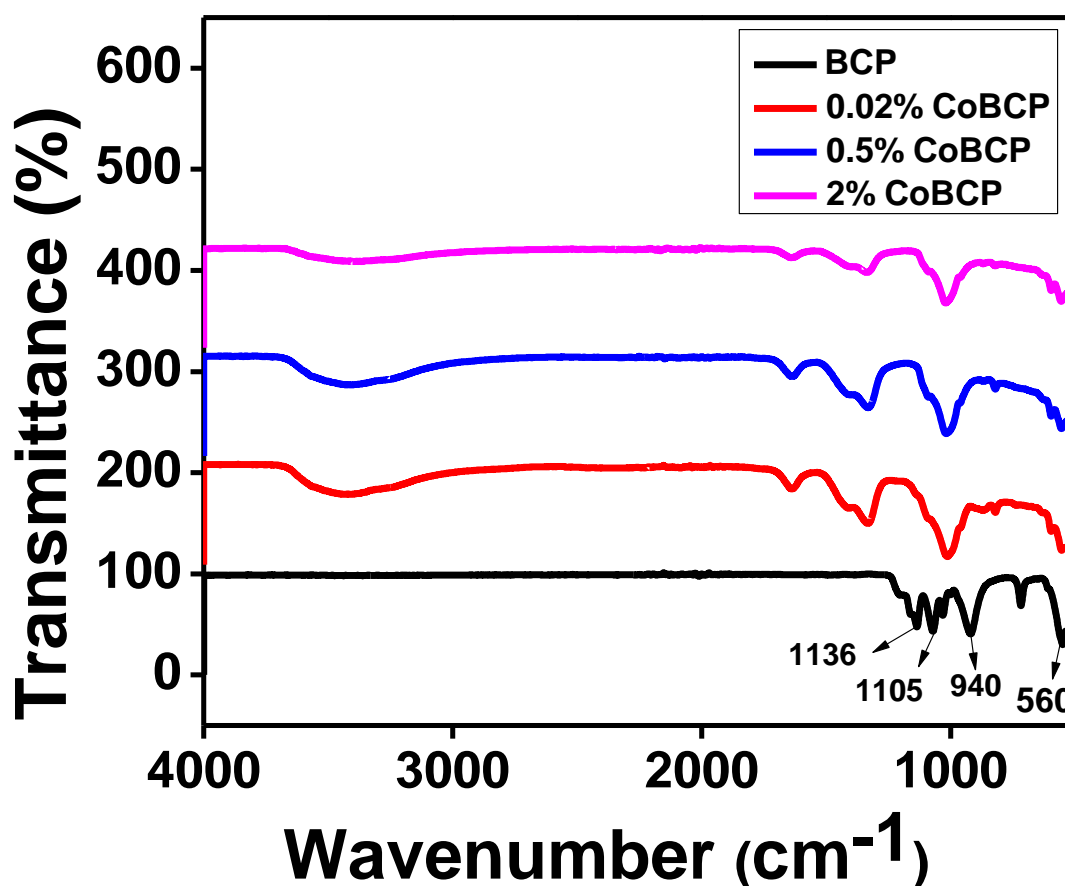

Fig. S1 FTIR spectra of BCP, 0.02% CoBCP, 0.5% CoBCP, and 2% CoBCP.

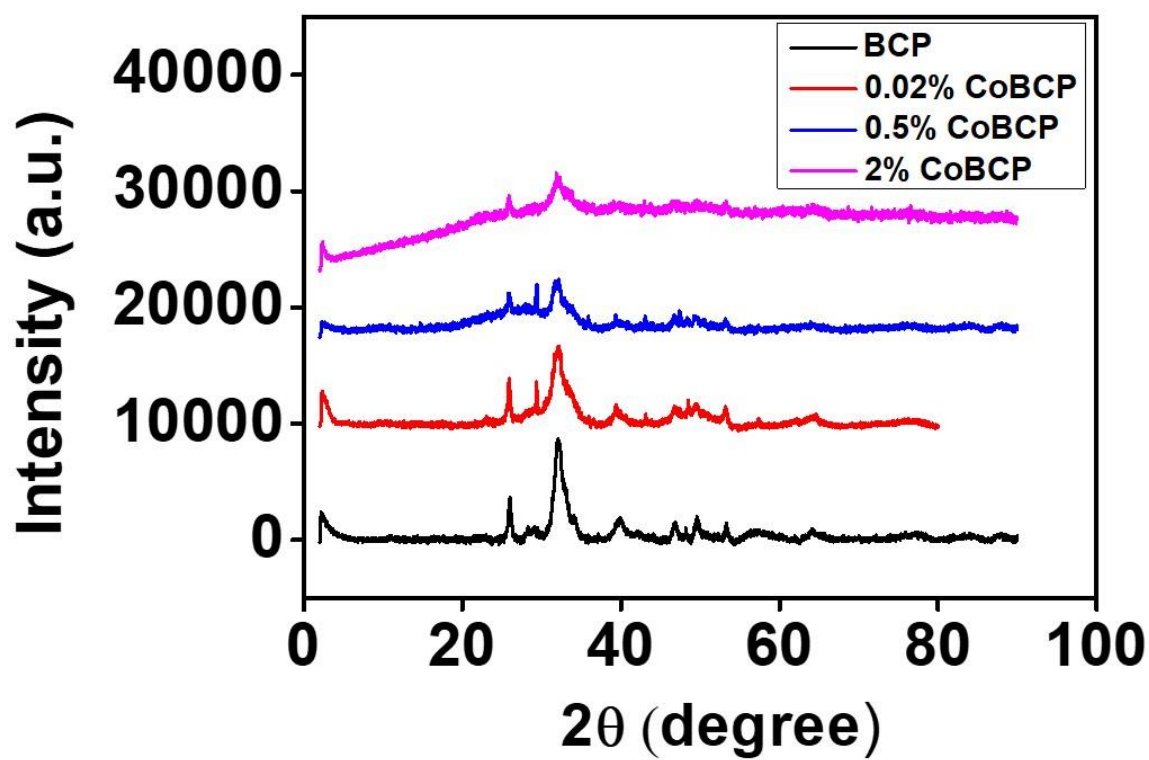

Fig. S2 XRD spectra of BCP, 0.02% CoBCP, 0.5% CoBCP, and 2% CoBCP.

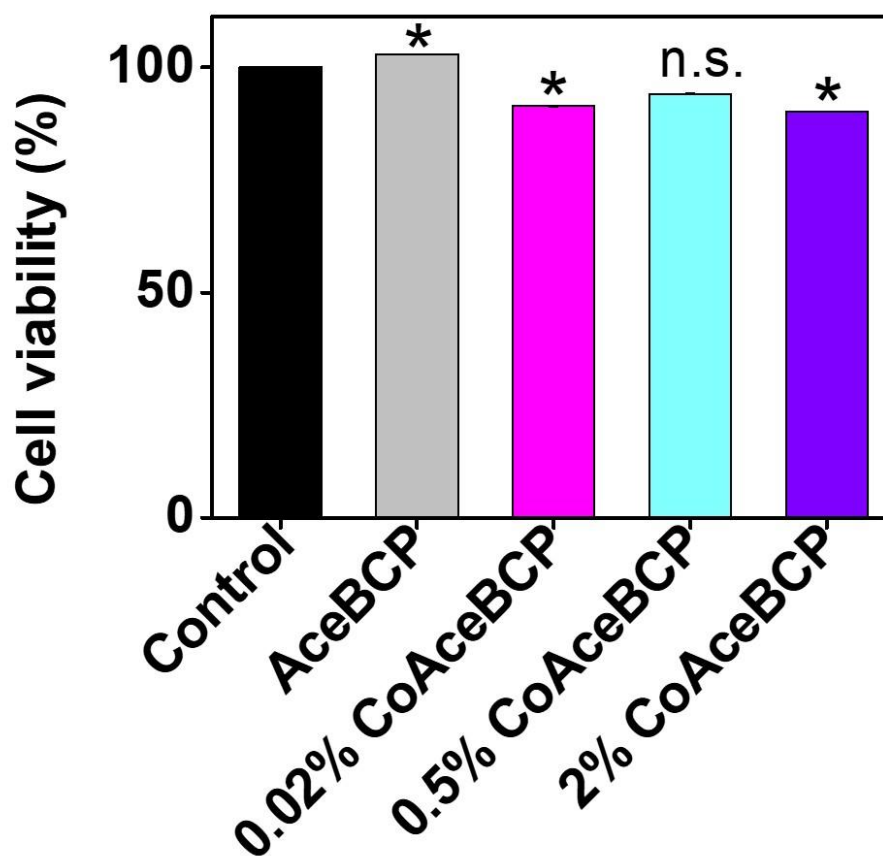

**Fig. S3** Viability of RAW264.7 cells in presence of nanoparticles using MTT assay. \*\* $p < 0.005$  and \* $p < 0.05$  denotes significant difference and n.s. corresponds to non-significant data ( $n = 3$ ).

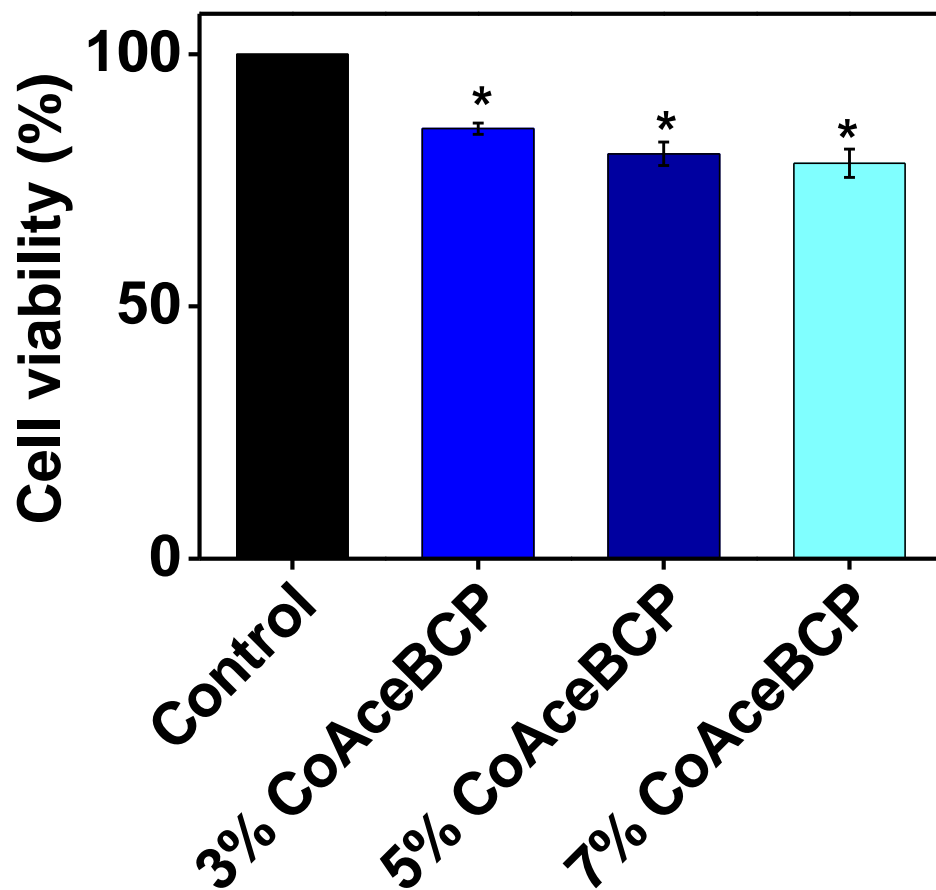

**Fig. S4** Cell viability of MC3T3-E1 cells in presence of 3%, 5%, and 7% acemannan coated, cobalt-doped biphasic calcium phosphate nanoparticles.

**Table S1** List of antibodies used along with their details.

| No. | Antibody                                           | Dilution                       | Company           | Catalog No. |
|-----|----------------------------------------------------|--------------------------------|-------------------|-------------|
| 1   | iNOS                                               | 1:400 for IF                   | CST               | 13120       |
| 2   | Arginase-1                                         | 1:50 for IF                    | CST               | AM4302      |
| 3   | Anti-rabbit IgG<br>(Alexa Fluor 488<br>conjugated) | 5 µg/ml for ICC                | Invitrogen        | A-11034     |
| 4   | TruStainFcX™ (anti-<br>mouse<br>CD16/32)           | 0.1 µg/million cells<br>for FC | BioLegend         | 101319      |
| 5   | FITC anti-mouse CD86                               | 5 µl/million cells for<br>FC   | BioLegend         | 105005      |
| 6   | APC anti-mouse CD206                               | 5 µl/million cells for<br>FC   | BioLegend         | 141707      |
| 7   | Anti-rabbit IgG<br>(Alexa Fluor 568<br>conjugated) | 2 µg/ml for ICC                | Invitrogen        | A-1101      |
| 8   | HRP-conjugated anti-<br>mouse IgG antibody         | 1:20000 for WB                 | Sigma-<br>Aldrich | A9044       |
| 9   | HRP-conjugated anti-<br>rabbit IgG antibody        | 1:20000 for WB                 | Sigma-<br>Aldrich | A9169       |

**Table S2** List of primers and their sequences.

| Mouse Primers |                |                       |                      |
|---------------|----------------|-----------------------|----------------------|
| No.           | Gene           | F.P. (5'-3')          | R.P. (5'-3')         |
| 1             | <i>β-Actin</i> | GTACTCTGTGTGGATCGGTGG | AGGGTGAAAACGCAGCTCAG |
| 2             | <i>CD163</i>   | TGCTCAGGAAACCAATCCCA  | ACCTCCACTCTTCCAGCG   |
| 3             | <i>CD206</i>   | TTCAGCTATTGGACGCGAGG  | GAATCTGACACCCAGCGGAA |
| 4             | <i>CD68</i>    | GGACTACATGGCGGTGGAAT  | TGGTCACGGTTGCAAGAGAA |
| 5             | <i>iNOS</i>    | CTTGGTGAAGGGACTGAGCTG | CGTTCTCCGTTCTTGCAGT  |
